# Supplementary material
Source: publisher figshare collection journal article supplement (https://sage.figshare.com/ndownloader/files/13851263)
Supplement: Supplementary file 1 [file 13851263]

**ONLINE APPENDIX**  
**Table 1. Summary Statistics\***

|                                     | Mean   | Std. Dev. | Min    | Max      |
|-------------------------------------|--------|-----------|--------|----------|
| <u>Sanction Success Equation</u>    |        |           |        |          |
| Sanction Success                    | 0.200  | 0.401     | 0      | 1        |
| Veto                                | 0.265  | 0.207     | 0      | 0.708    |
| Institutions                        | 0.212  | 0.409     | 0      | 1        |
| Sanction Costs                      | 1.302  | 0.576     | 1      | 3        |
| Trade Dependence                    | 0.037  | 0.073     | 0      | 0.573    |
| Target GDP per Capita (in 1000s)    | 10.705 | 10.608    | 0.288  | 42.535   |
| Major Issue                         | 0.433  | 0.496     | 0      | 1        |
| Threat                              | 0.583  | 0.494     | 0      | 1        |
| Imposition Year                     | 1981   | 17.688    | 1946   | 2005     |
| Democracy                           | 0.491  | 0.500     | 0      | 1        |
| Military Regime                     | 0.076  | 0.265     | 0      | 1        |
| Personalist Regime                  | 0.157  | 0.364     | 0      | 1        |
| <u>Sanction Imposition Equation</u> |        |           |        |          |
| Sanction Imposition                 | 0.493  | 0.500     | 0      | 1        |
| Democracy                           | 0.587  | 0.493     | 0      | 1        |
| Capability Ratio (Target/Sender)    | 8.424  | 62.981    | 0.0003 | 1048.108 |
| Total Trade                         | 0.256  | 0.173     | 0.001  | 0.941    |
| Trade Dependence                    | 0.038  | 0.073     | 0      | 0.769    |
| Target GDP per Capita (in 1000s)    | 11.557 | 10.691    | 0.199  | 57.239   |
| Post-Cold War                       | 0.484  | 0.500     | 0      | 1        |

\*Summary statistics are based on Model 2 in Table 1.

Figure 1. Impact of Veto Players for Non-Democratic and Democratic Targets

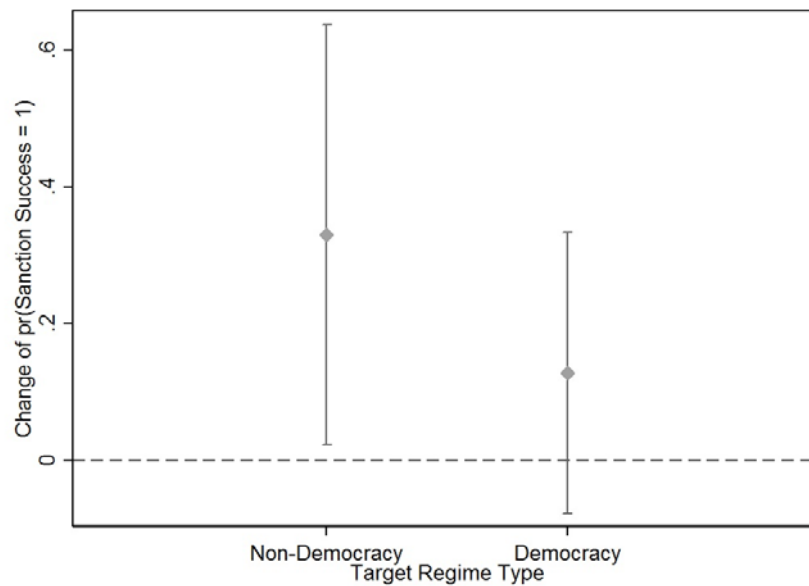

Note: Each plot denotes 95% confidence intervals. The control variables are held at their means (for the continuous variables) or their modes (for binary variables).

Figure 2. Impact of Veto Players at Differing Values of Target Trade Dependence

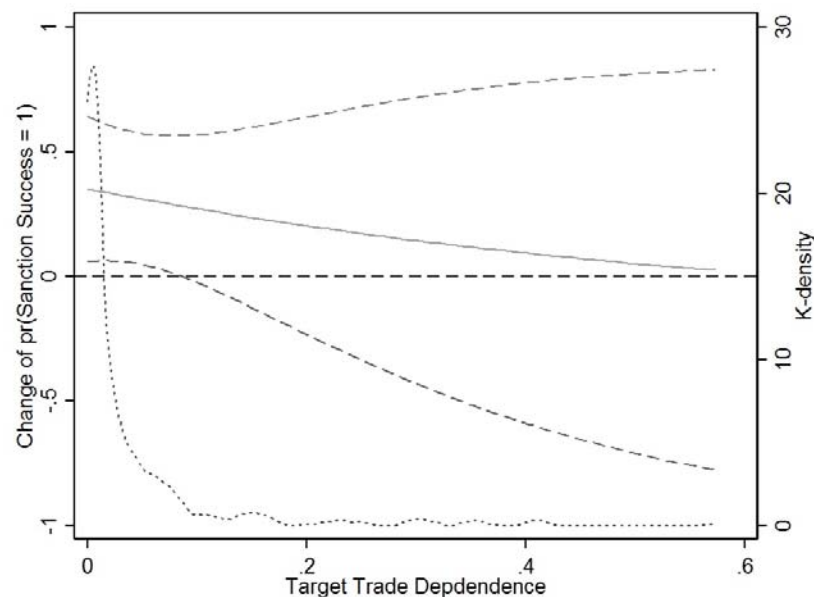

Note: Dashed lines denote 95% confidence intervals and short-dashed line denotes k-density of the target trade dependence. The control variables are held at their means (for the continuous variables) or their modes (for binary variables).

Figure 3. Impact of Veto Players at Differing Values of Target GDP per Capita

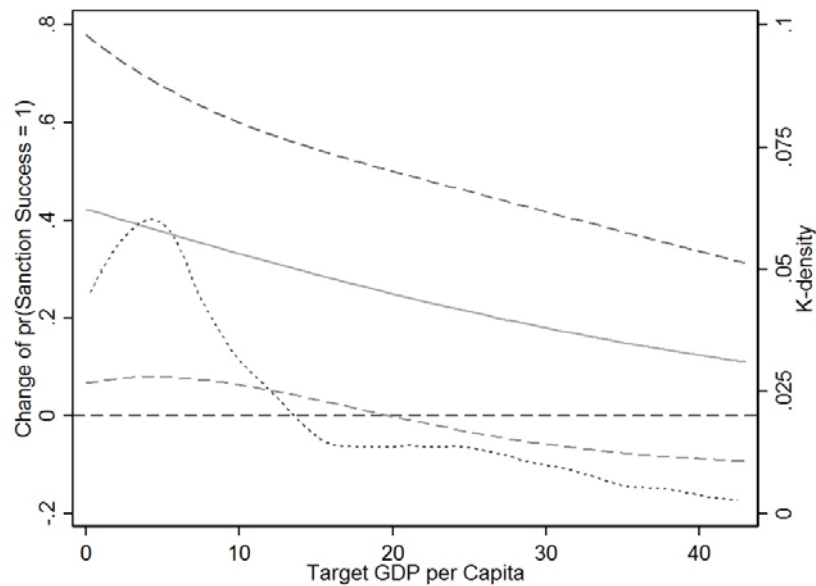

Note: Dashed lines denote 95% confidence intervals and short-dashed line denotes k-density of the target GDP per capita. The control variables are held at their means (for the continuous variables) or their modes (for binary variables).

Figure 4. Impact of Veto Players at Differing Values of Sanction Costs

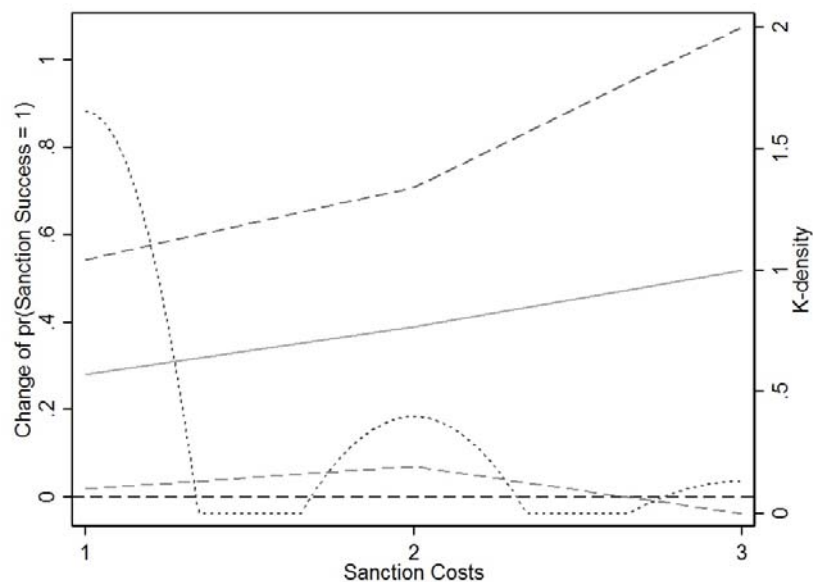

Note: Dashed lines denote 95% confidence intervals and short-dashed line denotes k-density of the sanction costs. The control variables are held at their means (for the continuous variables) or their modes (for binary variables).
